# Supplementary material for: Comparison of the Diagnostic Accuracy of Three Rapid Tests for the Serodiagnosis of Hepatic Cystic Echinococcosis in Humans
Source: PubMed Central journal article supplement (PMC4752287; doi:10.1371/journal.pntd.0004444), 2016-02-12

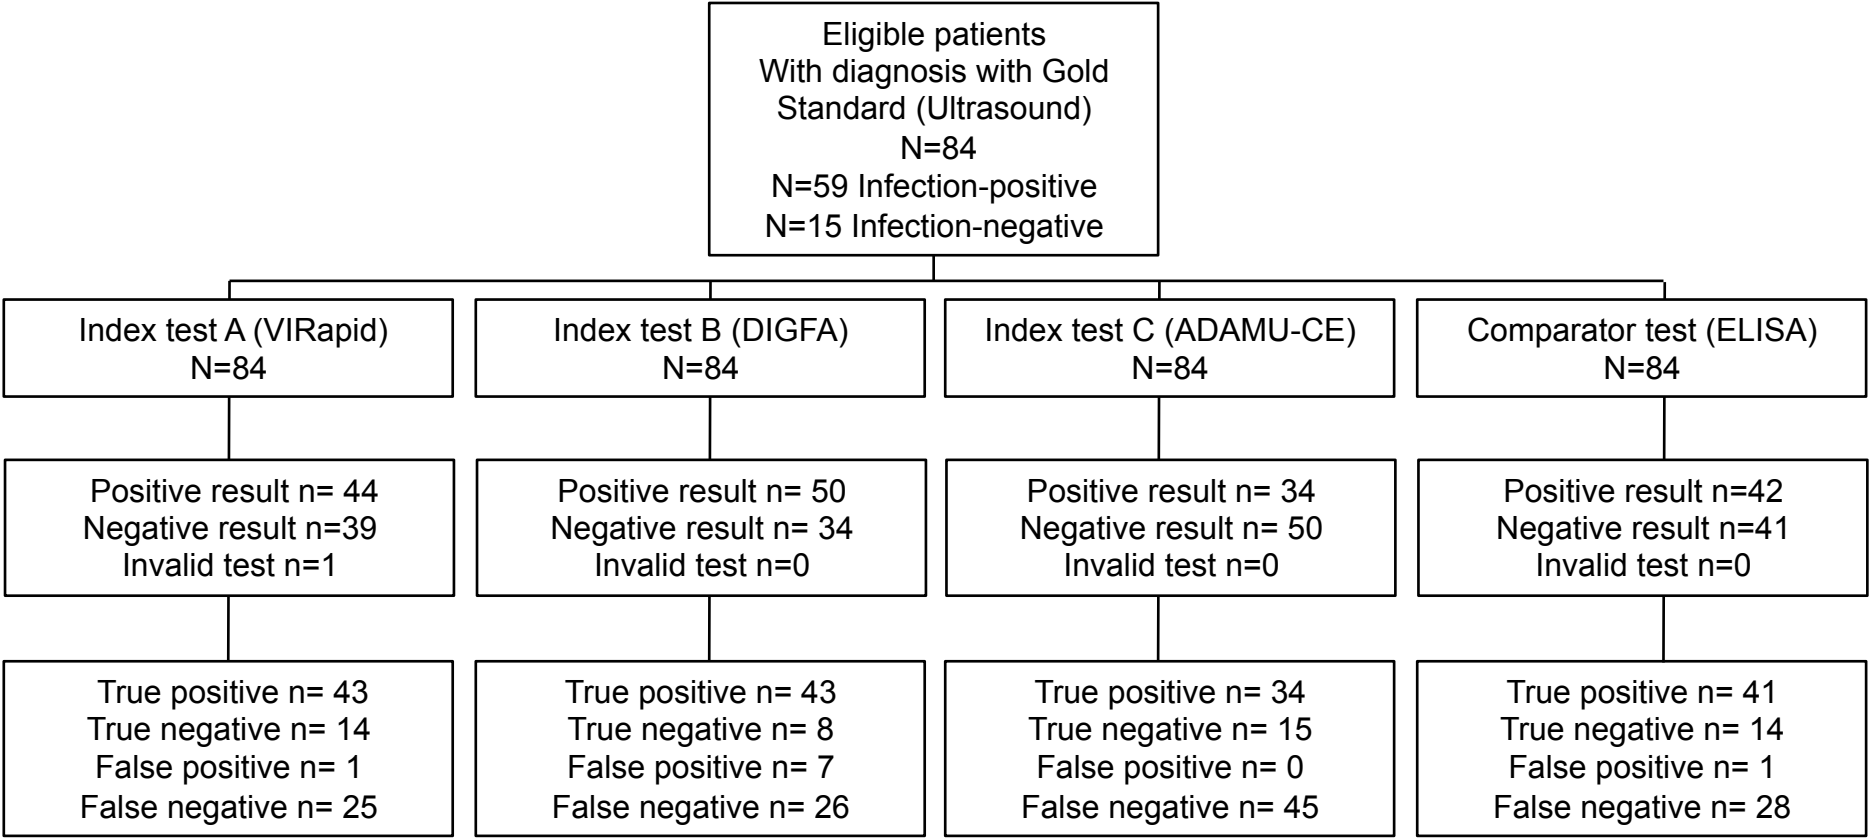

Supplement: pntd.0004444.s002.pdf [file pntd.0004444.s002.pdf]
